# Supplementary material
Source: ML conference proceedings conference paper supplement (https://proceedings.neurips.cc/paper_files/paper/2021/hash/6c19e0a6da12dc02239312f151072ddd-Abstract.html)
Supplement: Supplementary file 1 [file 6c19e0a6da12dc02239312f151072ddd-Supplemental.zip]

Archive with 11 entries (10 files):
- crvae/
- crvae/solver_base.py
- crvae/arguments.py
- crvae/README.md
- crvae/utils.py
- crvae/solver_vae.py
- crvae/solver_our.py
- crvae/main.py
- crvae/vae.py
- crvae/data.py
- crvae/Supplementary.pdf
