# Supplementary material
Source: ML conference proceedings conference paper supplement (https://proceedings.neurips.cc/paper_files/paper/2021/hash/6c19e0a6da12dc02239312f151072ddd-Abstract.html)
Supplement: Supplementary file 1 [file 6c19e0a6da12dc02239312f151072ddd-Supplemental.zip › crvae/README.md]

To run the experiments, you can simply use:


```python3 main.py --log_name test_log```
