# Supplementary material
Source: ML conference proceedings conference paper supplement (https://proceedings.neurips.cc/paper_files/paper/2021/hash/6c19e0a6da12dc02239312f151072ddd-Abstract.html)
Supplement: Supplementary file 1 [file 6c19e0a6da12dc02239312f151072ddd-Supplemental.zip › crvae/vae.py]

import torch
import torch.nn as nn
import torch.nn.functional as F
import torch.nn.init as init


class View(nn.Module):
    def __init__(self, size):
        super(View, self).__init__()
        self.size = size

    def forward(self, tensor):
        return tensor.view(self.size)

class VAE(nn.Module):
    def __init__(self, image_channels=3, h_dim=1024, z_dim=32):
        super(VAE, self).__init__()
        self.dim_h = 32

        self.encoder = nn.Sequential(
            nn.Conv2d(image_channels, 128, 4, 2, 1, bias=False),              # B,  128, 32, 32
            nn.BatchNorm2d(128),
            nn.ReLU(True),
            nn.Conv2d(128, 256, 4, 2, 1, bias=False),             # B,  256, 16, 16
            nn.BatchNorm2d(256),
            nn.ReLU(True),
            nn.Conv2d(256, 512, 4, 2, 1, bias=False),             # B,  512,  8,  8
            nn.BatchNorm2d(512),
            nn.ReLU(True),
            nn.Conv2d(512, 1024, 4, 2, 1, bias=False),            # B, 1024,  4,  4
            nn.BatchNorm2d(1024),
            nn.ReLU(True),
            View((-1, 1024*2*2)),                                 # B, 1024*4*4
        )

        self.fc1= nn.Linear(1024*2*2, z_dim)                            # B, z_dim
        self.fc2 = nn.Linear(1024*2*2, z_dim)                            # B, z_dim


        if image_channels == 3:
            self.decoder = nn.Sequential(
                nn.Linear(z_dim, 1024*4*4),                           # B, 1024*8*8
                View((-1, 1024, 4, 4)),                               # B, 1024,  8,  8
                nn.ConvTranspose2d(1024, 512, 4, 2, 1, bias=False),   # B,  512, 16, 16
                nn.BatchNorm2d(512),
                nn.ReLU(True),
                nn.ConvTranspose2d(512, 256, 4, 2, 1, bias=False),    # B,  256, 32, 32
                nn.BatchNorm2d(256),
                nn.ReLU(True),
                nn.ConvTranspose2d(256, 128, 4, 2, 1, bias=False),    # B,  128, 64, 64
                nn.BatchNorm2d(128),
                nn.ReLU(True),
                nn.ConvTranspose2d(128, image_channels, 1),                       # B,   nc, 64, 64
            )
        elif image_channels == 1:
            self.decoder = nn.Sequential(
                nn.Linear(z_dim, 1024*4*4),                           # B, 1024*8*8
                View((-1, 1024, 4, 4)),                               # B, 1024,  8,  8
                nn.ConvTranspose2d(1024, 512, 4, 2, 1, bias=False),   # B,  512, 16, 16
                nn.BatchNorm2d(512),
                nn.ReLU(True),
                nn.ConvTranspose2d(512, 256, 4, 2, 1, bias=False),    # B,  256, 32, 32
                nn.BatchNorm2d(256),
                nn.ReLU(True),
                nn.ConvTranspose2d(256, 128, 4, 2, 1, bias=False),    # B,  128, 64, 64
                nn.BatchNorm2d(128),
                nn.ReLU(True),
                nn.ConvTranspose2d(128, image_channels, 1),                       # B,   nc, 64, 64
                nn.Sigmoid(),
            )
        else:
            raise NotImplementedError
        

        self.weight_init()

        
    def reparameterize(self, mu, std):
        esp = torch.randn_like(mu)
        z = mu + std * esp
        return z

    
    def bottleneck(self, h):
        mu, logvar = self.fc1(h), self.fc2(h)
        std = torch.exp(0.5*logvar)
        z = self.reparameterize(mu, std)
        return z, mu, logvar 

        
    def representation(self, x):
        return self.bottleneck(self.encoder(x))[0]


    def forward(self, x):
        h = self.encoder(x)
        z, mu, logvar = self.bottleneck(h)
        return self.decoder(z), mu, logvar 


    def decode(self, z):
        return self.decoder(z)


    def encode(self, x):
        h = self.encoder(x)
        z, mu, logvar = self.bottleneck(h)
        return z, mu, logvar 


    def weight_init(self):
        for block in self._modules:
            try:
                for m in self._modules[block]:
                    kaiming_init(m)
            except:
                kaiming_init(block)


def kaiming_init(m):
    if isinstance(m, (nn.Linear, nn.Conv2d)):
        init.kaiming_normal(m.weight)
        if m.bias is not None:
            m.bias.data.fill_(0)
    elif isinstance(m, (nn.BatchNorm1d, nn.BatchNorm2d)):
        m.weight.data.fill_(1)
        if m.bias is not None:
            m.bias.data.fill_(0)


def normal_init(m, mean, std):
    if isinstance(m, (nn.Linear, nn.Conv2d)):
        m.weight.data.normal_(mean, std)
        if m.bias.data is not None:
            m.bias.data.zero_()
    elif isinstance(m, (nn.BatchNorm2d, nn.BatchNorm1d)):
        m.weight.data.fill_(1)
        if m.bias.data is not None:
            m.bias.data.zero_()
